# Supplementary material
Source: PubMed Central journal article supplement (PMC4255286)
Supplement: NIHMS585911-supplement-supplement_1.pdf [file NIHMS585911-supplement-supplement_1.pdf]

Copyright WILEY-VCH Verlag GmbH & Co. KGaA, 69469 Weinheim, Germany, 2013.

## Supporting Information

for *Advanced Materials Interfaces*, DOI: 10.1002/adhm.((please add manuscript number))

Materials Integration by Nanointaglio

Troy W. Lowry, Aubrey Kusi-Appiah, Jingjiao Guan, David H. Van Winkle, Michael W. Davidson, Steven Lenhart\*

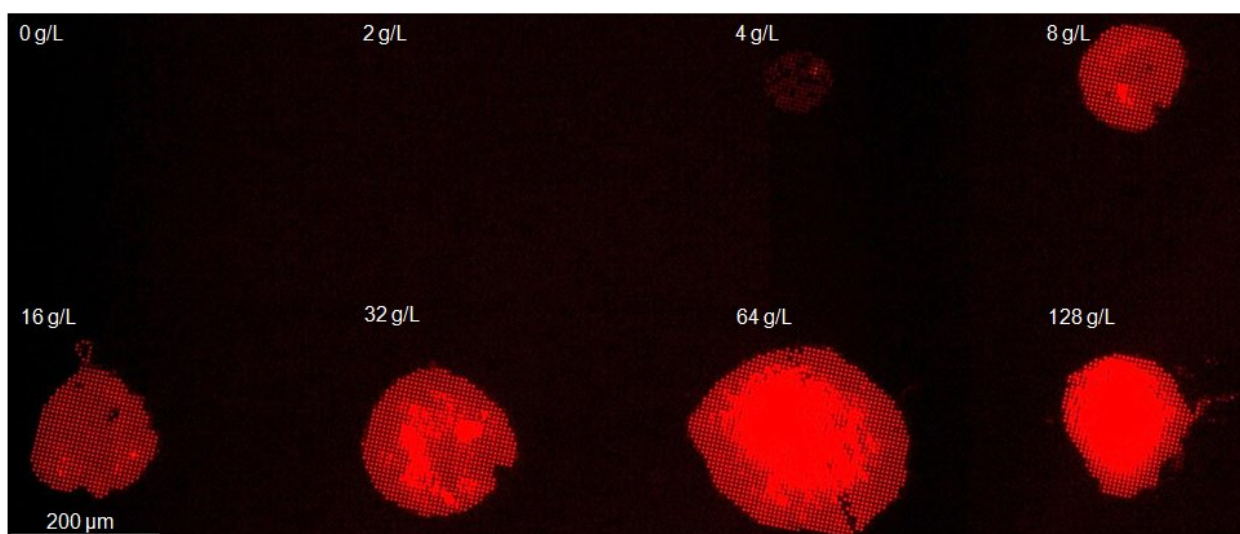

**Supporting Figure 1.** Variation of the ink concentration. 4x red fluorescence overview of lipid multilayer patterns created from microarraying and multilayer stamping using a 5 μm well pattern. DOTAP concentrations of 4, 8, 16, 32, 64, and 128 g/L stamped onto a glass substrate (4th print). Lipid concentrations at 2 g/L do not microarray sufficiently to allow pattern formation by lipid multilayer stamping.

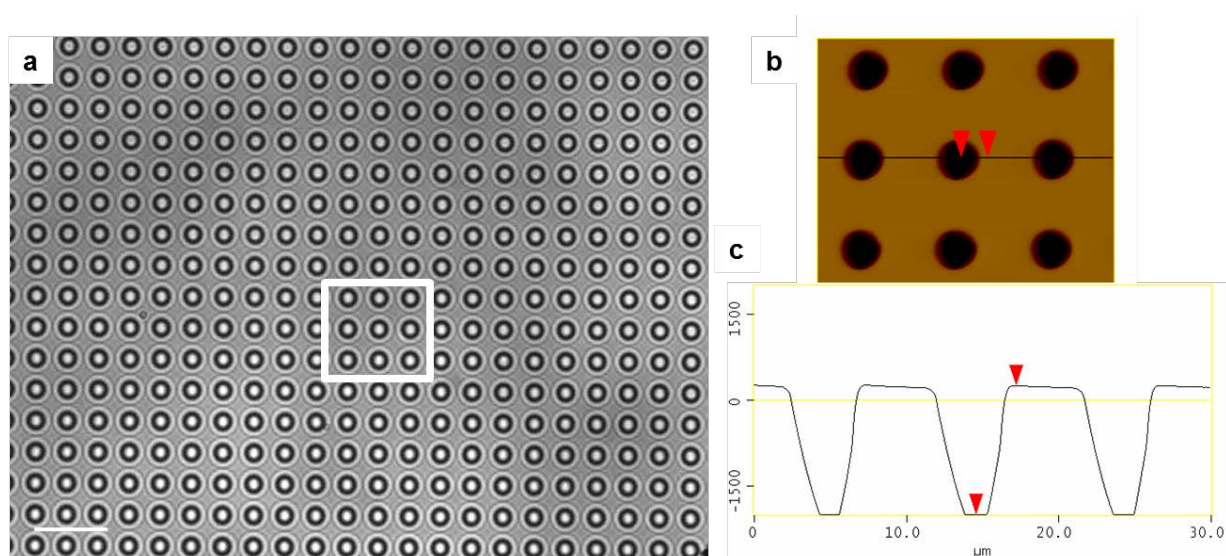

**Supporting Figure 2.** Characterization of a PDMS Stamp with 5  $\mu\text{m}$  diameter holes at a center-to-center spacing of 10  $\mu\text{m}$ . **a**, 40x bright field image of a section of the PDMS stamp the size of the white box in **a**. Bar = 25  $\mu\text{m}$ . **b**, AFM topographical image, and **c** sectional analysis shows that the wells are  $\sim 2.7$   $\mu\text{m}$  deep, with 5  $\mu\text{m}$  diameters.

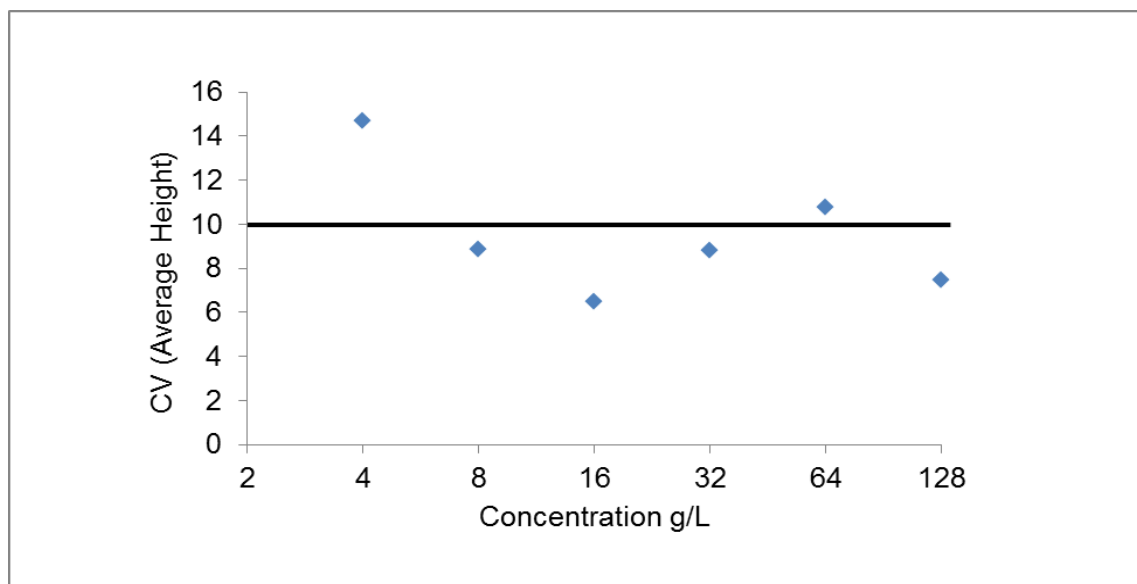

**Supporting Figure 3.** Coefficient of variation (CV) of the average height of the lipid dots derived from the series of AFM measurements on glass as shown in panel **e** of Figure 2 of the concentrations 4, 8, 16, 32, 64 and 128 g/L liposomal concentrations. The CV of the average height is 10 % or less for all concentrations except 4 and 64 g/L, indicating uniform patterning of the structures sampled.

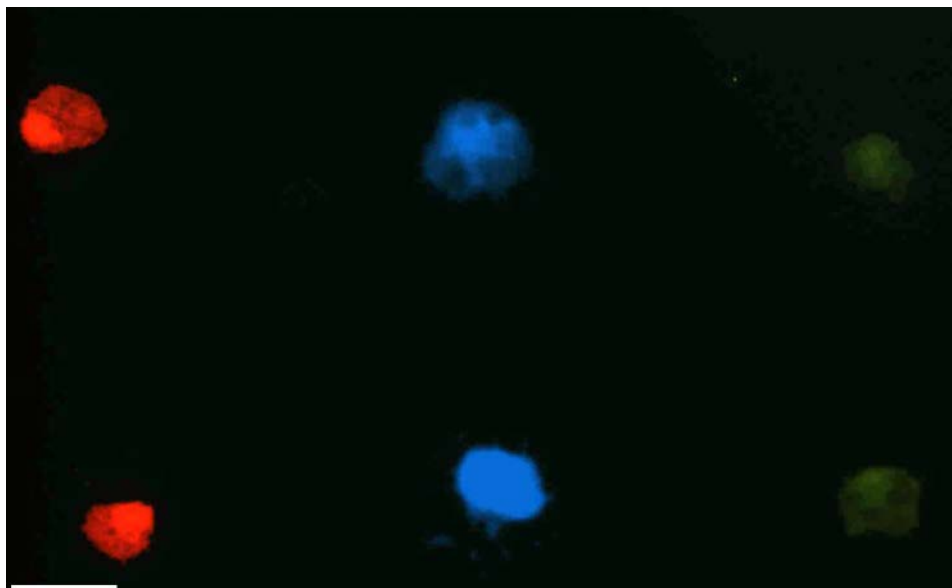

**Supporting figure 4.** Multicomponent patterning from microarraying. 2x3 ink pallet of DOTAP doped with 1 Mol % Rhodamine-DOPE, 2 Mol % Marina Blue-DHPE, and Carboxyfluorescein-DOPE. There was no detectable contamination of the different fluorescently tagged lipids. Scale bar = 200  $\mu\text{m}$

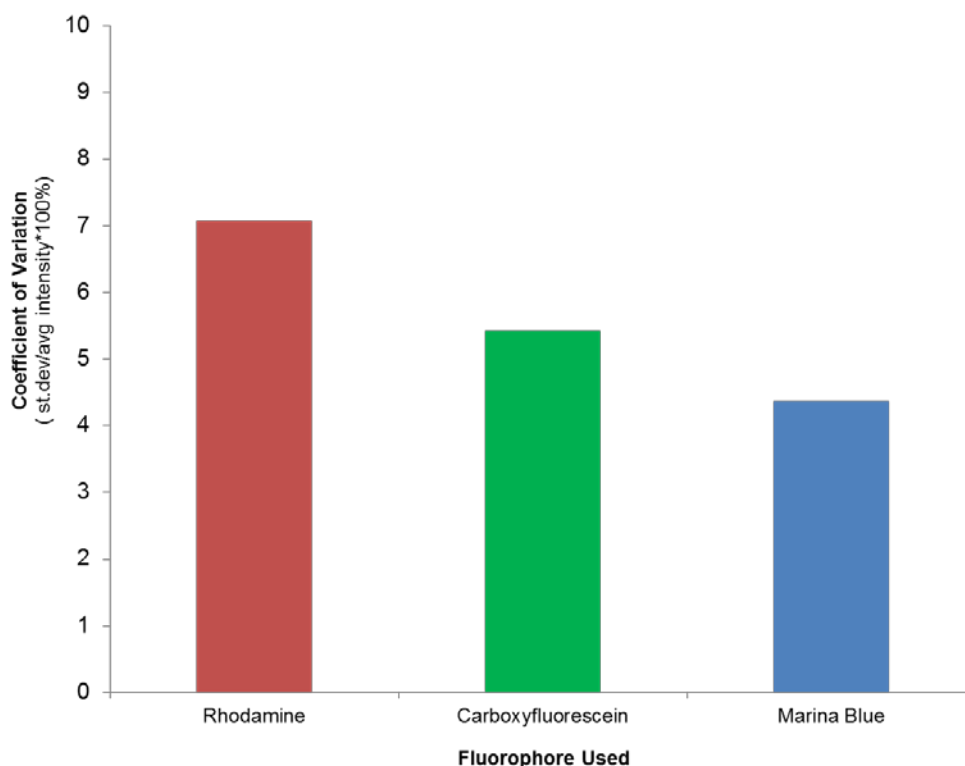

**Supporting figure 5.** Uniformity of integrated lipid dot patterns. The coefficient of variation (CV) of the three different fluorescently doped lipid dot patterns from figure panels 1 j-l is well below 10%, demonstrating uniform patterning. The CV was calculated by finding the average intensity for each dot shown in panels 1 j-l and then finding the intensities' average and standard deviation.
